# Supplementary material for: Non-myogenic tumors display altered expression of dystrophin (DMD) and a high frequency of genetic alterations
Source: PubMed Central journal article supplement (PMC5352069; doi:10.18632/oncotarget.10426), 2016-07-06
Supplement: oncotarget-08-145-s001.pdf [file oncotarget-08-145-s001.pdf]

## Non-myogenic tumors display altered expression of dystrophin (DMD) and a high frequency of genetic alterations

### SUPPLEMENTARY TABLES

Supplementary Table S1: *DMD* differential expression between Females and Males

| Sample Series | probe         | Females(normal)/<br>Males(normal) |        |       | Females(tumoral)/<br>Males(tumoral) |        |       | Females(normal+tumoral)/<br>Males(normal+tumoral) |        |       |
|---------------|---------------|-----------------------------------|--------|-------|-------------------------------------|--------|-------|---------------------------------------------------|--------|-------|
|               |               | p-value                           | Log FC | FC    | p-value                             | Log FC | FC    | p-value                                           | Log FC | FC    |
| GSE10072      | 203881_s_at   | 0.240                             | 0.227  | 1.170 | 0.509                               | 0.118  | 1.085 | 0.632                                             | 0.080  | 1.057 |
| GSE39716      | 8171921       | 0.007*                            | -0.843 | 0.557 | 0.914                               | -0.029 | 0.980 | 0.639                                             | -0.112 | 0.925 |
| GSE44076      | 11722991_a_at | 0.135                             | -0.254 | 0.839 | 0.268                               | -0.292 | 0.817 | 0.158                                             | -0.217 | 0.861 |

\*this study included only a limited number of samples (3 normal tissues from Females and Males); therefore, this difference was not considered significant.

Supplementary Table S2: DMD expression in myogenic tumors

| Reference Series | Samples analyzed                                                                        | Probe       | FC   | p.Value |
|------------------|-----------------------------------------------------------------------------------------|-------------|------|---------|
| GSE2719          | 2 normal tissues (stomach & small intestine)<br>vs. 2 GIST                              | 203881_s_at | 0.80 | 0.721   |
| GSE2719          | 2 normal tissues (stomach & small intestine)<br>vs. 6 leiomyosarcomas                   | 203881_s_at | 2.19 | 0.222   |
| GSE2685          | 8 non-tumoral gastric tissues vs. 22 primary<br>human advanced gastric cancer tissues   | L35854_at   | 0.65 | 0.079   |
|                  |                                                                                         | M18533_at   | 0.68 | 0.120   |
|                  |                                                                                         | S81419_at   | 0.78 | 0.153   |
| GSE764           | 4 normal myometrium vs. 9 uterine<br>leiomyosarcoma + 4 extra-uterine<br>leiomyosarcoma | L35854_at   | 0.51 | 0.136   |
|                  |                                                                                         | M18533_at   | 0.46 | 0.194   |
|                  |                                                                                         | S81419_at   | 0.80 | 0.644   |

**Supplementary Table S3: Cancer studies analyzed from cBioPortal**

See Supplementary File 1
